# Supplementary material for: Sex Differences in the Interaction of Epigenetic Risk and Trajectories of Default Mode Limbic Network Integration Predicting Childhood Anxiety
Source: Research Square preprint supplement (doi:10.21203/rs.3.rs-9286569/v1), 2026-04-19
Supplement: Supplementary file 1 [file dda1b543ffe0907fd8b66585.docx]

**SUPPLEMENTARY INFORMATION**

**Sex Differences in the Interaction of Epigenetic Risk and Trajectories of Default Mode-Limbic Network Integration Predicting Childhood Anxiety**

**Parks, *et al*.**

**Supplementary Material**

**Table S1. Characteristics of excluded mother-child dyads**

|  | n = 234 |  | % |
| --- | --- | --- | --- |
| ***Infant*** |  |  |  |
| **Sex** |  |  |  |
| Female | 110 |  | 47 |
| Male | 124 |  | 58 |
| **Gestational age** |  |  |  |
| <37 weeks | 24 |  | 10.3 |
| 37-40 weeks | 36 |  | 15.4 |
| >40 weeks | 174 |  | 74.4 |
| ***Mother*** |  |  |  |
| **Age** |  |  |  |
| 18-24 years | 38 |  | 16.2 |
| 25-34 years | 149 |  | 62.7 |
| 35-44 years | 47 |  | 20.1 |
| **Ethnicity** |  |  |  |
| Chinese | 110 |  | 47 |
| Malay | 72 |  | 30.8 |
| Indian | 52 |  | 22.2 |
| **Highest education level** |  |  |  |
| Primary/elementary | 11 |  | 4.7 |
| Secondary/high school | 62 |  | 26.5 |
| Vocational/ITE/NITEC | 29 |  | 12.4 |
| A levels/polytechnic/diploma | 56 |  | 23.9 |
| University or higher | 76 |  | 32.5 |
| **Maternal Psychopathology (PW26)** | |  |  |
| BDI-II | Mean: 9.28 | SD: 6.52 | Range: 0-31 |
| STAI | Mean: 34.98 | SD: 9.76 | Range: 20-58 |

**Table S2. Sex-specific simple slopes for the association between DNAm at birth and anxiety symptoms across levels of DAN-limbic network integration**

| **Sex** | **DAN-Limbic network integration** | ***B*** | **SE** | **T** | **p** |
| --- | --- | --- | --- | --- | --- |
| **Females** | Low (-1 SD) | -0.04 | 0.22 | -0.2 | .842 |
|  | Mean | -0.02 | 0.15 | -0.11 | .912 |
|  | High (+1 SD) | 0.01 | 0.19 | 0.06 | .952 |
| **Males** | Low (-1 SD) | -0.81 | 0.41 | -1.98 | .053 |
|  | Mean | -0.31 | 0.17 | -1.81 | .074 |
|  | High (+1 SD) | 0.2 | 0.31 | 0.62 | 0.537 |

Note: DAN = Dorsal Attention Network.
